# An effector deletion leads to the breakdown of partial grapevine resistance to downy mildew

Manon Paineau<sup>a</sup>, Andrea Minio<sup>b</sup>, Pere Mestre<sup>c</sup>, Frédéric Fabre<sup>a</sup>, Isabelle D. Mazet<sup>a</sup>, Carole Couture<sup>a</sup>, Fabrice Legai<sup>d,e</sup>, Thomas Dumartinet<sup>f</sup>, Dario Cantu<sup>b,g\*</sup>, and François Delmotte<sup>a,\*</sup>

<sup>a</sup>INRAE, Bordeaux Sciences Agro, SAVE, ISVV, Villenave d'Ornon, France

<sup>b</sup>Department of Viticulture and Enology, University of California Davis, Davis 95616, CA, USA

<sup>c</sup>INRAE, Université de Strasbourg, SVQV, Colmar, France

<sup>d</sup>INRAE, IGEPP, Le-Rheu, France

<sup>e</sup>INRIA, IRISA, GenOuest Core Facility, Rennes, France

<sup>f</sup>Univ. Bordeaux, INRAE, BIOGECO, F-33610 Cestas, France

<sup>g</sup>Genome Center, University of California Davis, Davis 95616, CA, USA

Grapevine downy mildew, caused by the oomycete *Plasmopara viticola*, is a globally destructive disease that particularly affect the Eurasian wine grape *V. vinifera*. While genetically resistant varieties are becoming more accessible, populations of *P. viticola* are demonstrating rapid adaptability, successfully overcoming these resistances. Here we aimed to identify the avirulence genes involved in the interaction with the Rpv3.1-mediated resistance in grapevine. We sequenced the full genome of 136 *P. viticola* strains sampled in a natural population of Bordeaux (France) and characterized their development on both resistant and sensitive cultivars. The genome-wide association study allowed the identification of a genomic region associated with the breakdown of Rpv3.1 grapevine resistance (avrRpv3.1 locus). A diploid-aware reassembly of the *P. viticola* INRA-Pv221 genome allowed to detect structural variations in this locus, including a major 30 Kbp deletion. At the avrRpv3.1 locus, virulent *P. viticola* strains presented deletion on both haplotypes indicating that avirulence is recessive. The deletion involves two closely-related genes that encode proteins containing 800-900 amino acids with a signal peptide. The structure of the predicted proteins contains repeats of the LWY-fold structural modules, typical of oomycete effectors. Moreover, when these proteins were transiently expressed, they induced cell death in grapevines carrying Rpv3.1 resistance, confirming their avirulence nature. The first description of candidate effectors of *P. viticola* involved in the interaction with resistance gene provides valuable insights into the genetic mechanisms that enable *P. viticola* to adapt to grapevine resistance, laying a foundation for developing strategies to manage this damaging crop pathogen.

Grapevine downy mildew | *Plasmopara viticola* | oomycete | GWAS | structural variant | effector

Correspondence: [francois.delmotte@inrae.fr](mailto:francois.delmotte@inrae.fr); [dacantu@ucdavis.edu](mailto:dacantu@ucdavis.edu)

## Introduction

Grapevine downy mildew, caused by the obligate biotrophic oomycete *Plasmopara viticola* (Berk. & M. A. Curt.) Berl. & De Toni, is one of the most destructive diseases worldwide (1). The disease was endemic in North America (2, 3), where native grape species had developed genetic resistance, and it was accidentally introduced to southwest France in the 1870s from where it rapidly spread throughout Europe (4, 5). The Eurasian wine grape *Vitis vinifera* L. is highly susceptible to this disease and disease control is mostly achieved through the use of fungicides. Grapevine breeding programs

around the world have been producing new cultivars genetically resistant to the disease by introgressing disease resistance loci from wild grape species. Resistance to downy mildew found in grapevine is mainly partial and caused by Resistance-genes (R-gene) that, depending on the resistance source, may explain up to 80% of downy mildew infection on the plant (6, 7). Over 30 downy mildew resistance loci have been identified in American and Asian *Vitis* species (8), but only few of them are currently being utilized in breeding programs : Rpv1 (9), Rpv3 (10–12), Rpv10 (13), and Rpv12 (6). Many of these cultivars are now commercially available and gaining popularity among growers, especially following the promotion of agroecological transition and pesticide use restrictions imposed by the European Union (14).

*Plasmopara viticola* possesses a remarkable ability to evolve, as demonstrated by its rapid adaptation to synthetic fungicides (15–17). In addition to large population size and an obligatory sexual cycle (18), *P. viticola* boasts a highly repetitive genome, altogether granting it a great evolutionary potential (19, 20). Consistent with this and despite a limited deployment of disease-resistant grape cultivars in vineyards, breakdown of resistance has been reported, and some *P. viticola* strains are already able to simultaneously overcome several resistance loci, including Rpv3.1, Rpv3.2, Rpv10, and Rpv12 (17, 21–26). The ability of *P. viticola* populations to rapidly adapt to resistant grapevines is concerning because of the substantial breeding efforts required to identify resistance sources and develop new resistant cultivars. Minimizing the risk of grapevine resistance genes depletion requires a better understanding on the genetic mechanisms responsible for pathogen adaptation to host resistance.

Grapevine resistance to downy mildew is marked by the triggering of hypersensitivity responses (HR) upon infection by *P. viticola*, suggesting a gene-for-gene interaction between the plant and the pathogen. Most genetic factors of grape conferring resistance to downy mildew identified until now are located in genomic regions rich in Nucleotide Binding Domain and Leucine-Rich Repeat (NBS-LRR) genes (7, 27, 28). The presence of NBS-LRR genes was confirmed by the cloning of the loci causing Rpv1 and Rpv3 resistance (29, 30). NBS-LRR proteins are involved in the recognition of specialized pathogen effectors. In oomycetes, the

RXLR family is the largest and most studied family of cytoplasmic effectors. RXLR effectors are characterized by the presence of a signal peptide, a RXLR-EER motif at their N-terminal sequence and one or more WY-domains, a common fold found only in this family of proteins (31). Structural studies revealed an additional fold present in RXLR effectors, the LWY domain, which is often present in tandem repeats, conferring structural and functional modularity (32). Related candidate effector proteins that possess a signal peptide and carry WY-domains and the EER motif, but lack an RXLR motif, have been described in several downy mildews species (33–36). To date, all the effectors of *P. viticola* that have been investigated were discovered through *in silico* predictions (19, 37–42). While these studies have provided valuable insights into the mechanisms employed by the pathogen to infect its host, none of them have been reported to be directly related to a gene-for-gene interaction with resistance loci. Therefore, the specific effectors targeted by grape resistance genes remain entirely unknown to date.

Rpv3.1 is the most exploited resistance in viticulture (12). This resistance has been introduced from an American grape species into the crop germplasm at the end of the 19th century. It is present in most of the French-American hybrids and in many modern varieties resistant to downy mildew. In response to *P. viticola* infection, Rpv3.1 triggers effector-triggered immunity and localized necrosis in grapevine leaves (11). The causal factor for this resistance was recently mapped to a single locus of grapevine genome containing two TIR-NB-LRR (TNL) genes that originated from a tandem duplication (interleukin-1 receptor-nucleotide binding-leucine-rich repeats) (30). On the pathogen side, rapid adaptation to Rpv3.1-mediated resistance has been reported in several geographically distant populations of *P. viticola* over the past decades (17, 21–24, 26, 43). Overall, these findings suggest a gene-for-gene interaction between TNL genes of the plant and an undescribed avirulence gene of the pathogen.

In recent years, genome-wide association studies (GWAS) have become increasingly popular for identifying virulence/avirulence factors in fungal plant pathogens (44–51). In oomycetes, while the method has shown success in detecting the genomic regions underlying fungicide resistance and mating-type (20, 52), it has not yet been employed for discovering avirulence genes. In this study, we used GWAS to identify the avirulence genes interacting with Rpv3.1-mediated resistance of grapevine. To this end, we sampled 136 strains of *P. viticola* from a natural population in Bordeaux (France) and characterized their development on both resistant (Rpv3.1) and susceptible grapevines. By sequencing the genome of these strains, we were able to identify candidate effectors and the genomic event responsible for the breakdown of Rpv3.1-mediated resistance.

## Results

**Localization of the virulence locus by GWAS.** Sequence data was obtained for 123 strains (over the 136 sequenced). A total of 1,851,765 SNPs were retained, resulting in an

average density of 20.8 SNPs / kbp on the 359 scaffolds of the *P. viticola* reference genome. To assess the phenotypic variability of the 123 *P. viticola* strains, we evaluated the percentage of leaf disc area covered by sporulation in a cross-inoculation experiment between the 123 *P. viticola* strains and two grapevine varieties: Cabernet Sauvignon (susceptible, Rpv3.1-), and Regent, carrying the resistance locus Rpv3.1 (Rpv3.1+) (Figure 1A and B). On Cabernet Sauvignon, the strains displayed an average of sporulation of 10.4% (sd = 3.92) (in gray on Figure 1B). On Regent, the average sporulation area of the strains was 6.91% (sd=6.41) (in orange on Figure 1B). While the distribution of sporulation area of the strains on Cabernet Sauvignon is centered around the mean, the sporulation variability among strains observed on Regent ranged from 0.01% to 29.33% and follows a bimodal distribution (Figure 1A): a first group of strains displaying around 2.5% of sporulation area on Regent and a second group displaying around 14% of sporulation area.

We used the sporulation area of the strains on Regent as a quantitative trait to perform a Genome-Wide Association Study (GWAS). We used a Genome wide Efficient Mixed Model Association (GEMMA) to correct for the population structure bias evidenced by the principal component analysis (Figure S2). The Quantile-Quantile (Q-Q) plot showed no evidence of inflation in test statistics for the sporulation on Regent ( $\lambda=1.04$ ) (Figure S3). Finally, the proportion of phenotypic variation explained (PVE) estimated by GEMMA was 0.58, indicating that genetic variants account for 58% of the phenotypic variance in our population.

We identified a total of 74 markers strongly associated with this phenotypic trait (Figure 1C). On the scaffold Plvit038, the 66 markers are located in an interval of 3,340 bp (Figure 1D and S4 A and B) and exhibit strong linkage disequilibrium (Figure S4 D). No gene nor pseudogene was detected at this location on the genome assembly (Figure 1D and S4 C). In the locus on scaffold Plvit053, 8 markers, in an interval of 144 bp, were significantly associated with the sporulation on Regent (Figure 1D and S4 A and B) and are in strong linkage disequilibrium (Figure S4 D). The significant SNPs identified by GWAS are at the edges of Plvit038 and Plvit053 scaffolds (Figure S4 A) and show evidence of being tightly associated as observed by a strong linkage disequilibrium (Figure 1D). The high  $R^2$  values around 0.7 observed between the two scaffolds indicates a close physical proximity of the sequences, which appears to have been disrupted by the fragmentation of the genome assembly. Based on the gene annotation (19), one gene is located in this region: PVIT-0015215.T1 (Figure 1D).

**A structural rearrangement identified in the avrRpv3.1 locus.** To discern any potential disparities between haplotypes in the haploid consensus reference genome and better understand the link between the two loci identified by GWAS, we performed a diploid-aware *de novo* assembly using FalconUnzip (53). This approach allowed us to reconstruct and annotate the gene content for both alternative haplotypes, as presented in Table S2. The primary assembly, which represents the most contiguous haploid representation

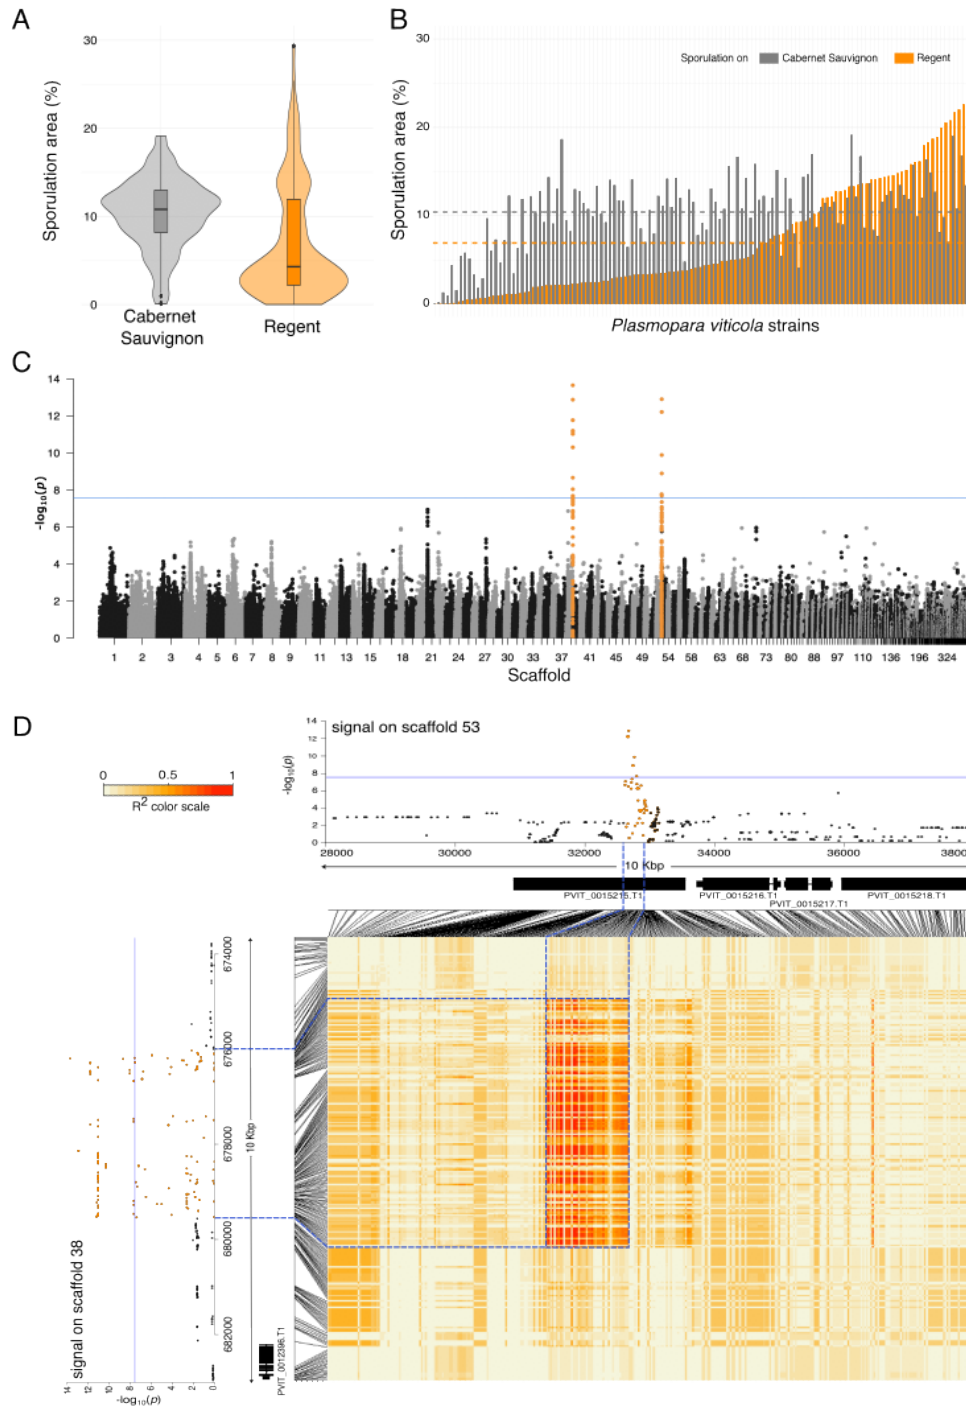

**Fig. 1.** Result of association genomics analysis of *P. viticola* virulence on the resistant variety Regent carrying Rpv3.1. (A) Boxplots showing the distribution of the sporulation area of the population on Cabernet Sauvignon (Rpv3.1-, grey) and Regent (Rpv3.1+, orange). (B) Histogram of the sporulation area of each of the 123 strains on Cabernet Sauvignon (grey) and Regent (orange). Values correspond to the mean of sporulation area in percentage for six replicates. The horizontal dashed lines represent the average of the population on Cabernet Sauvignon (grey) and Regent (orange). The standard error and strain names are not represented for readability of the figure and are available in SI dataset S1. (C) Manhattan plot of the whole genome. Each point corresponds to a single SNP. The x-axis represents the physical location of each SNP on the genome (split by scaffold). The y-axis represents the significance of the association between a SNP and the studied phenotypic trait. The blue horizontal line indicates the significance threshold corrected by the Bonferroni criterion ( $\alpha=0.5$ ). The two loci significantly associated with virulence on Rpv3.1 are indicated in orange. (D) Linkage Disequilibrium ( $R^2$ ) between the two signals identified by GWAS. The heatmap illustrates the  $R^2$  values between each SNP in the signals from scaffold Plvit038 (y-axis) and SNPs in the signals from scaffold Plvit053 (x-axis). The two Manhattan plots provide a zoomed-in view of the two targeted loci located on scaffolds Plvit038 and Plvit053, as presented in panel C. The locations of genes within the locus are indicated below the Manhattan plots. Correspondence between SNPs in the Manhattan plots, their positions in genes, and their  $R^2$  values in the matrix is highlighted using blue dashed lines.



of the genome, comprises 80.6 Mb divided into 252 primary contigs, containing 23,602 protein coding gene loci. The genome size of this new assembly (80.6 Mb) is comparable to previous assembly results but falls intermediate between a previous SMRT sequencing assembly (92.94 Mb, (19)) and an Illumina assembly (74.74 Mb, (54)). This is attributed to the combined effect of improved representation of repetitive content enabled by long reads and the utilization of a diploid-aware procedure capable of effectively segregating highly divergent alleles into haplotigs (i.e., phased alternative haplotypes). Moreover, with the longest sequence reaching 3.17 Mbp and an N50 of 825.8 kbp (N50 index 29), the new diploid assembly exhibits enhanced sequence contiguity compared to previous *P. viticola* strain INRA-Pv221 assemblies (19, 54). Falcon-Unzip reported a separate alternative haplotype representation for over 66.5% of the *P. viticola* genome (53.6 Mb in 745 Haplotigs, 15,642 protein coding gene loci), confirming the extensive structural variability present between haplotypes in the INRA-PV221 strain.

By aligning the scaffolds Plvit038 and Plvit058 with the sequences of both primary contigs and haplotigs of the diploid reference, we confirmed the contiguity of the two scaffolds within the same genomic region (Figure S5 A and B). This was ascertained by their juxtaposition on both a primary contig (Primary\_000014F) and one of its associated haplotigs (Haplotig\_000014F004), as illustrated in Figure S5 C and D. Additionally, we discovered the presence of structural variations between the two haplotypes within this locus, hereafter named *avrRpv3.1*. These structural variations were identified in the vicinity of the anticipated gene locus that encodes PVIT\_0015215.T1. A major structural event involving a 30 kbp deletion was observed (Figure 2 and Figure S7) at this locus. Specifically, the genomic region spanning from 695 kbp to 725 kbp in Primary\_000014F is absent from Haplotig\_000014F004. This finding suggests that the consensus haploid assembly (19) exclusively represented the structure of the locus represented in the haplotig sequences. The deletion and the other structural variants found in the locus affects three coding gene loci: Primary\_000014F.g163, Primary\_000014F.g164 and Primary\_000014F.g165 (hereafter called g163, g164 and g165). The gene g163 is translocated along with a transposable element (TE) found in this region (Figure 2). We discarded g163 from the following analyses as it is not deleted and is related to TEs. The genes g164 and g165, which were absent in the consensus assembly, are deleted in the haplotig and were not found to be duplicated in the genome. Gene PVIT\_0015215.T1 of the consensus assembly corresponds to gene g166 from the diploid assembly (99.9% coverage and 98% identity), located right next to the deletion and present in both haplotypes (Figure 2). These genes are called hereafter *avrRpv3.1* genes.

To gain a comprehensive understanding of the distribution of *avrRpv3.1*-like genes in *P. viticola* and other oomycete plant pathogens, we utilized the sequence of g164 as a query and conducted a search through oomycete genomes available in GenBank using BlastP. A total of 11 sequence matches were found in *P. viticola* genome and 14 sequences in the genome

of *P. halstedii*, one of which being annotated as an RXLR-like protein. No sequence matches were observed outside the genus *Plasmopara*, including *Bremia*, *Phytophthora* and *Pythium* species. Interestingly, the 11 sequences of *P. viticola* were organized in a single cluster within the scaffold Primary\_000014F (Figure S7). Within *P. viticola*, the gene size ranged from 2,535 to 2,688 bp with a mean size at 2,650 bp. The 11 *P. viticola* proteins presented a high degree of similarity estimated by pairwise comparison of sequences (average of 61% identity). The phylogenetic analyses (Figure S7) indicated that g162, g164, g165, g166 and g169 formed a well supported group among which g164 and g165, the two genes included in the deletion, where the closest relatives (69.76% of conserved amino acids). Altogether, the analyses of *avrRpv3.1* candidate genes evidenced that a genus-specific gene family expansion has occurred through tandem duplication events in the *P. viticola* genome.

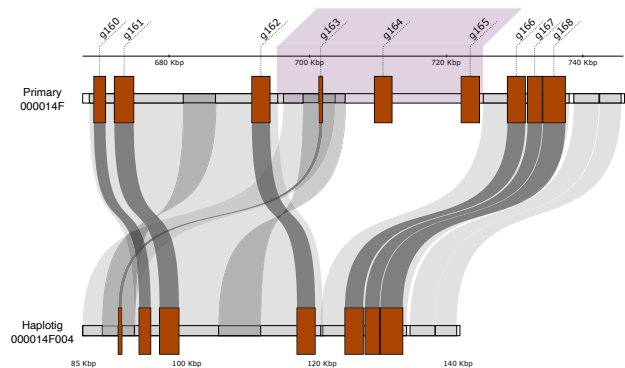

**Fig. 2.** Structural representation of the locus associated with virulence against Rpv3.1 resistant grapevine, *avrRpv3.1*, on both haplotypes of the reference genome INRA-Pv221. The genes are shown as brown squares. The deletion associated with this locus, identified through GWAS, is highlighted in purple. The links between the Primary and Haplotig sequences (as well as between genes) connect regions showing significant homology, indicating that the sequences from the Primary are similar to those on the underlying Haplotig (Figure S6).

**Allelic diversity at the *avrRpv3.1* locus.** We explored the allelic variation at the *avrRpv3.1* locus (interval between 640 and 740 kbp of Primary\_000014F) in the 123 *P. viticola* strains. For each strain, we performed a diploid-aware copy number variation (CNV) analysis to identify regions that were significantly different in coverage in the locus from the rest of the contig (Primary\_000014F) and detect the underlying structural variants (Figure 3A and Figure S8-S9). We observed that the deletion at the locus *avrRpv3.1* is variable in size, evidencing the existence of multiple allelic forms. We identified the presence of one allele without any deletion (Avr) and six alleles (*avr1* to *avr6*) presenting deletions ranging from 14 kbp to 96 kbp (Figure S10). The high density of TEs in this region impact the accuracy of the deletion coordinates. The deletion impacted the presence of genes g164 and g165. The five *avr* alleles share a deletion of the gene g164, which is complete in all alleles, except for *avr2* where g164 is only partially deleted. The gene g165 is present in *avr3*, partly deleted in *avr2* and *avr4* and fully deleted in *avr1*, *avr5* and *avr6* (Figure 3B and Figure S10).



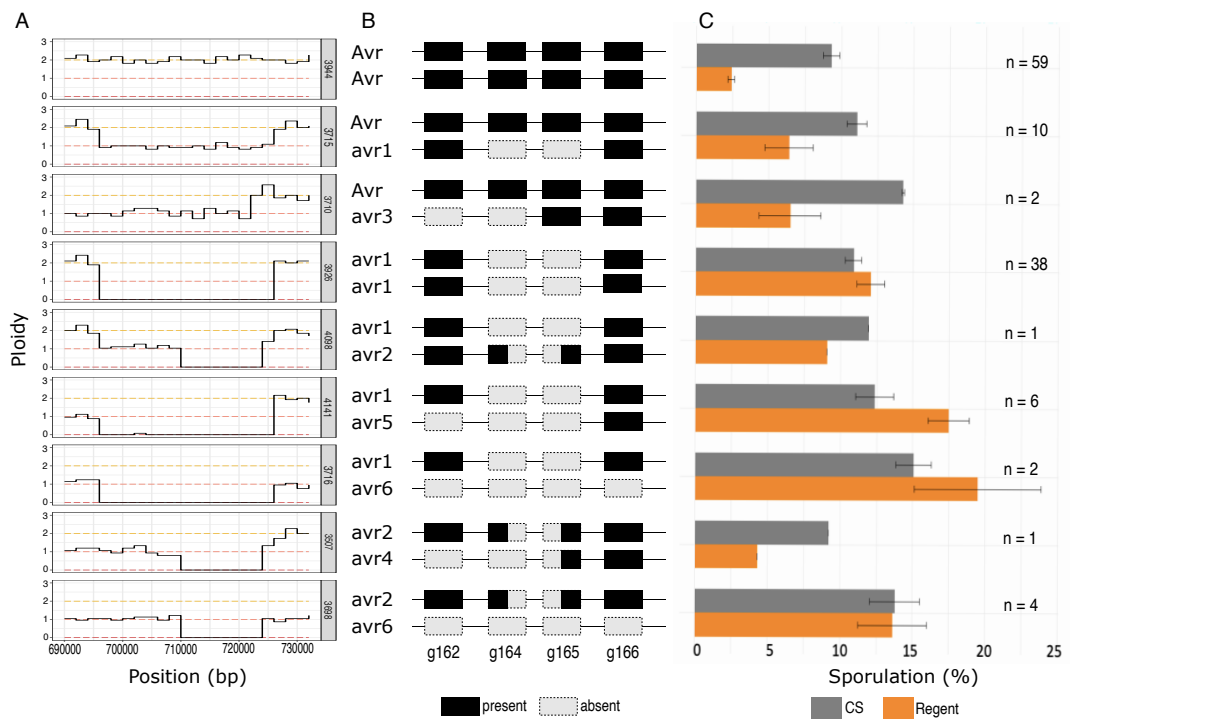

**Fig. 3.** Allelic configuration analysis of the 123 *P. viticola* strains at the locus *avrRpv3.1*. (A) Patterns of coverage in the locus. A relative level of coverage of two indicates the presence of sequences both haplotypes, a level of one indicates that the sequence is present in only one of the two haplotypes, 0 copy means a complete deletion of the sequence in both haplotypes. Only one strain is represented per allelic configuration, details for all strains, from 640 to 740 Kpb, are available in Figures S8-S9. (B) Schematic representation of the locus in its diploid form with the genes (rectangles) involved. Black rectangles indicate the presence of the gene, grey rectangles indicate deletion of the gene, black and grey rectangles indicate a partial deletion of the gene. (C) Phenotype associated with each genotypes. Barplots indicate the sporulation area on Cabernet Sauvignon (CS) (grey) and on Regent (orange) observed for the isolates associated with to each of the allelic configurations. The number of strains of each category are indicated by *n*.

Through CNV analysis, nine distinct allelic configurations were identified among the 123 strains (Figure 3B): 59 were homozygous for the Avr allele, 12 were heterozygous (Avr/avr) and 52 display a deletion on both haplotypes (avr/avr). The Avr allele was thus the most frequent one (53%) followed by *avr1* (39%). The frequency of the five other *avr* alleles represented 8% of the population and varied from 0,5% to 3%. The average sporulation area associated with each genotype on both Cabernet Sauvignon (CS) (Rpv3.1-) and Regent (Rpv3.1+) is depicted in Figure 3C. Strains with the Avr/Avr genotype, i.e., homozygous without any deletion, display four times more sporulation area on CS (mean = 9.31%) than on Regent (mean = 2.4%). The *avr/avr* genotypes have a similar or higher sporulation on Regent (mean = 12.91%) than on CS (mean = 11.42%). Finally, the Avr/avr genotypes display a sporulation two times more important on CS (mean = 11.62%) than on Regent (mean = 6.41%). It may be noted that strains Avr/avr have a sporulation level on Regent that is variable, ranging from 5% to 15% of the sporulation area (details for each strains displayed in Figure S12). Overall, we concluded that the breakdown of the Rpv3.1 resistance results from to the structural variations at the locus *avrRpv3.1*.

Additionally, we examined the *avrRpv3.1* locus in another *P. viticola* strain collected from Switzerland that exhibited virulence on Rpv3.1-resistant varieties (strain *avrRpv3-Rpv12-* in (21)). Using the same pipeline analysis as for our *P. viticola* population, we observed a 30 kbp deletion in one haplotype

and a 56 Kpb deletion in the other at this locus (Figure S12). This matched the *avr1/avr5* genotypes of *P. viticola* identified in our population. Overall, the results obtained on *P. viticola* strains from a different geographical origin confirm that structural variations at the *avrRpv3.1* locus are involved in the breakdown of Rpv3.1 resistance.

Based on the allelic configurations described above, the *avrRpv3.1* locus revealed to be in strong Hardy Weinberg (HW) disequilibrium ( $p$ -value =  $1.34e-21$ ) with a negative *D* value ( $D = -24.65$ ) suggesting a strong deficit of heterozygous genotypes. This result contrasts with results obtained along the contig Primary\_000014F, where more than 95% of the SNPs were at HW equilibrium as expected for neutral markers in panmictic populations. We also observed a high genetic differentiation ( $F_{ST} = 0.58$ ) between strains sampled on the susceptible and the resistant varieties at the locus while the average  $F_{ST}$  calculated across the contig was found to be  $0.03 \pm 0.05$  with 99% of the  $F_{ST}$  values lower than the value calculated at the *avrRpv3.1* locus (Figure S13). The heterozygote deficits and strong genetic differentiation between strains collected on susceptible and resistant grapevines may result from host selection occurring at the *avrRpv3.1* locus.

**The candidate genes of the *avrRpv3.1* locus encode putative effector proteins.** The genes *g164*, *g165* and *g166* present in the region encoded proteins of 800-900 amino acids that were predicted to possess a signal peptide (SP) and that did not contain other motifs or domains based on InterPro

searches. Alignment of the protein family revealed an EER motif, but absence of RXLR or RXLR-like motifs in their N-terminal sequence and the presence of repeated motifs (Figure S14). Structural similarity searches using HHPred and Phyre2 produced best hits with the structures of RXLRs effectors PSR2 from *Phytophthora sojae* and PcRXLR12 from *Phytophthora capsici*.

We next modeled the structure of g166 using AlphaFold2. The overall quality parameters of the model allowed to be confident in the backbone structure (Figure S15 A and B). The g166 predicted structure is horseshoe-shaped and similar to the AlphaFold-predicted structure of a related protein from *P. halstedii* (Figure S15 C,D). Because the predicted structure appeared modular, we hypothesized that it was composed of repeats of the LWY-fold. We thus divided the g166 predicted structure into structural modules based on the PSR2 LWY domain structure, starting at the N-terminus with the alpha-helices corresponding to the helix bundle 1 (HB1) of the LWY domain. The g166 structural modules obtained, which we tentatively named LWY modules, produced a good overlap between them at the N-terminus but they were different at the C-terminus (Fig S16 A). Furthermore, superimposition of the PSR2 LWY motifs and the g166 LWY modules revealed an overlap at the level of the PSR2 LWY HB1 but a different structural organization for HB2 (Figure S16 B).

We divided the g166 predicted structure into modules that contained the HB1-like sequence at the C-terminal part, resulting in a protein consisting of 9 modular repeats, most containing 5 alpha-helices (Fig 4 A), which we tentatively named LW modules. Superimposition of g166 LW modules 2 to 9 revealed a good structural overlap (Fig 4 B), while LW module 1 appeared to be different. Superimposition of the HB1s from PSR2 and g166 LW modules showed a good overlap (Fig 4 C) and alignment of the primary sequences confirmed the conserved position of amino acids involved in maintaining the structure, with the exception of the PSR2 L2 position, which was replaced by a conserved Trp in g166 (Fig 4D). These observations suggest that the candidate genes found in the *avrRpv3.1* locus encode putative effector proteins.

**Candidate *avrRpv3.1* proteins induce cell death in plants carrying *Rpv3.1*.** Virulence towards *Rpv3.1* was associated with the deletion of g164 and g165, making them the most promising candidates to be the cognate *Rpv3.1* avirulence gene. We assessed the *Rpv3.1*-dependent cell death-inducing activity of *avrRpv3.1* genes by transient expression of the proteins coded by g164, g165 and the closely related gene g166.

We confirmed the presence of the three genes in the avirulent strain Pv221 with a PCR on genomic DNA (Figure S17). RNA-seq data at 24-, 48- and 72-hours post-inoculation (hpi) revealed that g164, g165 and g166 showed to be modulated in a were expressed at very low level at 72 hpi (SI Dataset S6). The results were confirmed with a semi-quantitative RT-PCR revealing that all 3 genes are expressed in germinated spores and during infection (Figure S18). The expression pattern suggests weak constitutive expression.

We cloned the coding sequences for g164, g165, and g166,

without the signal peptide, from the reference avirulent *P. viticola* strain INRA-Pv221. Two alleles were obtained for g166, which we named g166p and g166h according to the original haplotype. As shown in Figure 5, all genes induced cell death in Regent but not in Syrah. Induction of cell death by g166h was the stronger and more reproducible. Our results suggest that the candidate effector proteins from the *avrRpv3.1* locus can induce *Rpv3.1*-dependent cell death.

## Discussion

By employing a GWAS approach, entailing the phenotyping of *P. viticola* strains and their whole-genome sequencing, we successfully identified the *avrRpv3.1* locus involved in the interaction with the *Rpv3.1*-mediated resistance in grapevine. We presented compelling evidence, based on population genetics indices, that this locus displayed non-neutral characteristics and demonstrated signs of positive selection on resistant hosts. Within this locus, the deletion of two coding genes (g164, g165) is associated to the *Rpv3.1* resistance breakdown. These two genes are part of a cluster of 11 closely-related proteins, all exhibiting the characteristic traits of potential oomycete effectors, including the presence of a signal peptide and EER motif, as well as structural similarities to known RXLR effectors. Notably, these effector proteins possess an unusually large size for oomycetes, measuring approximately 880 amino acids. To put this into perspective, the largest known oomycete effectors to date are PsPSR2 (670 aa; (32) ) and AVRcap1b (673 aa; (55)) and an analysis of the RXLR effector repertoire across seven oomycete species encompassing 2,126 proteins, revealed only eight proteins exceeding 800 aa in size (32). Through predicted structural modeling, we identified a modular arrangement within the candidate effector proteins, featuring repeats reminiscent of the LWY fold (32). Based on predicted structure, the identified modules overlapped with the LWY fold only at the level of the helix bundle 1 (HB1) suggesting a possible new fold in the effector repertoire of oomycetes. Prior to this research, no avirulence genes had been characterized in the oomycete pathogen *P. viticola*. This study therefore presents the first-ever documentation of avirulence genes responsible for breakdown of resistance in grapevine.

The experimental results showed that both candidate effectors (g164, g165) and the closely related gene (g166) induce cell death in presence of *Rpv3.1*, suggesting that the gene/s in the *Rpv3.1* locus recognize all three effectors. The *Rpv3.1* locus has been previously mapped to an interval containing two TIR-NB-LRR (TNL) genes, and it has been proposed that both genes are essential for conferring resistance (30). This raises the possibility that each TNL gene interacts with different effectors, potentially exhibiting varying degrees of recognition strength. Another aspect to consider is the introgression of *Rpv3.1* in Regent, which involves a 15 Mb linkage drag encompassing a cluster of Nucleotide-binding and leucine-rich repeat (NLR) genes (56). It remains plausible that some of the candidate effector genes are recognized by other genes within this cluster. Overall, these findings suggest that *Rpv3.1*-mediated resistance may be the result of cu-

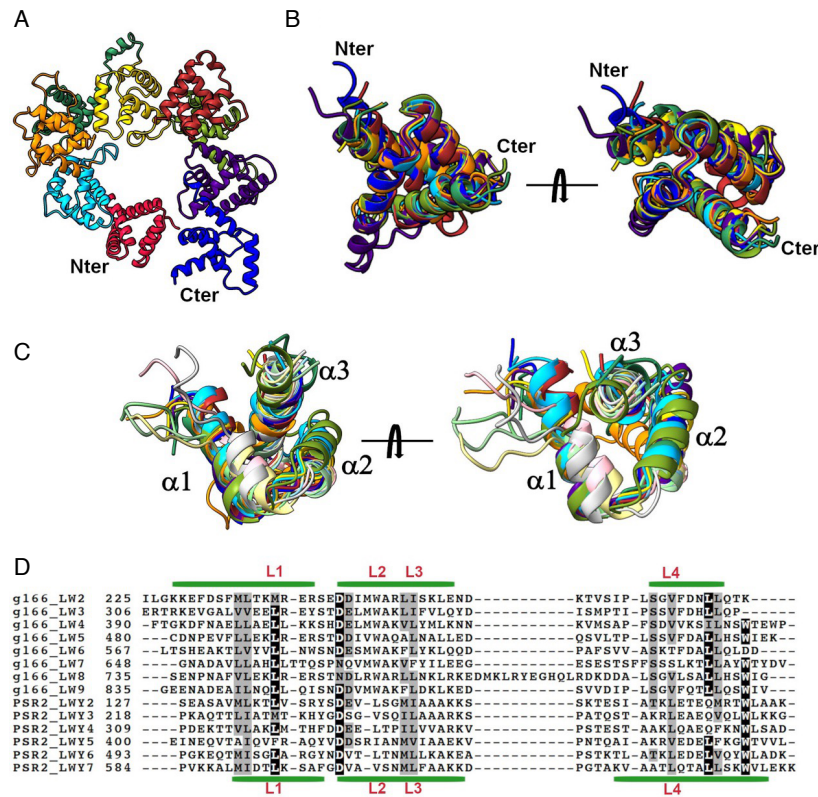

**Fig. 4.** The predicted tertiary structure of g166 is composed by modules containing the HB1 fold from the LWY domain. (A) Predicted structure of g166. The first 108 amino acids have been removed for clarity. Modules 1 to 9 are shown with different coloring (1 to 9: red, light blue, orange, green, yellow, brown, olive, purple, blue). (B) Superimposition of LW modules 2 to 9 from g166, seen from two different angles. Coloring as in A. The N- and C-terminal parts of the modules have been trimmed for clarity. (C) Superimposition of the N-terminal helix-bundle 1 (HB1) from LWY-domains 2 to 7 from *P. sojae* PSR2 and the C-terminal HB1 from LW modules 2 to 9 of g166. Alpha-helices 1 to 3 are indicated. Coloring in g166 as in A. Coloring of PSR2 LWYs (2 to 7): light sky blue, khaki, sea green, silver, light pink, light green. (D) Alignment of the HB1 primary sequences from the g166 LW modules and the PSR2 LWYs. Green lines indicate alpha-helices 1 to 3 (from left to right) for g166\_LW2 (top) and PSR2\_LWY7 (bottom). Conserved Leu residues contribution to the HB1 fold are shown in red. Note the conservation of a Trp in the g166\_LWYs at the L2 position. Black background shows identity and grey background shows similarity (75 % cutoff).

mulative responses from the plant upon recognition of multiple effectors by one or more resistance genes. Consequently, the loss of some of these effectors by the pathogen could lead to the breakdown of resistance. We indeed observed that the deletion of genes g164 and g165 is strongly associated with a high sporulation area on Rpv3.1-resistant hosts by *P. viticola* strains. The deletion of avirulence genes serves as an effective evolutionary strategy employed by pathogens to evade recognition and overcome plant defenses. Similar mechanisms have been documented in various fungal plant pathogens, including *Leptosphaeria maculans* (57), *Zygomoseptoria tritici* (46), and *Melampsora larici-populina* (58). In these cases, the loss of effector genes enhances the virulence of pathogens in Brassica crops, wheat, and poplar, respectively.

The presence of a multi-gene effector family accompanied by a high density of transposable elements (TEs) suggests genomic instability in the region. The rapid evolution of avirulence genes often occurs in genomic regions characterized by high TE content, punctual mutations, and structural variations (59, 60). Previous studies have shown that TE insertions near avirulence factors can have a significant impact on the virulence of fungal plant pathogens (49, 61, 62). Con-

sistent with this notion, various structural variations such as deletions, inversions, and recombinations were detected at the *avrRpv3.1* locus. Another aspect of the locus variability lies in the range of deletion sizes observed, ranging from 14 kbp to 96 kbp. TEs are likely to play a significant role in this genome evolution, as their mobility can expand the gene space through DNA duplication, interruption, or induction of effector gene deletion (60, 63, 64). These new insights may have important implications when choosing a strategy for deploying grapevine resistance genes. Theoretical studies highlighted how the evolutionary and epidemiological control provided by the main deployment strategies (mixture, mosaic, pyramiding), but also their relative ranking, crucially depends on a sound knowledge of the mutation rate leading to pathogen breakdown (see (65) for a review and (66) for an application to grapevine downy mildew). This study shows the diversity of the mutational events, such as the complete or partial gene deletion, leading to virulence. All these events contribute to greatly increase the overall mutation probability towards virulence (67). In this setting, the pyramiding strategy is not necessarily the most sustainable one for preserving the efficacy of grapevine resistance genes (66).

The genetic variability observed at the *avrRpv3.1* locus in the



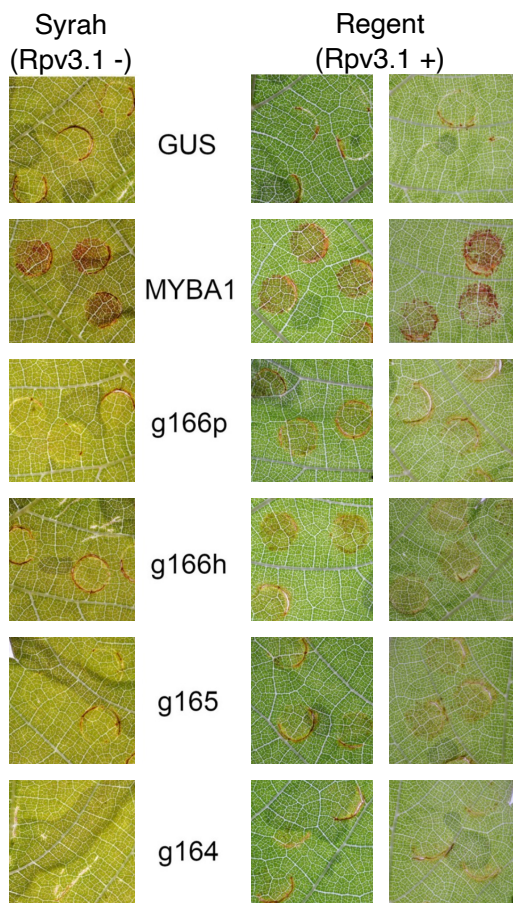

**Fig. 5.** Candidate effector proteins from the *avrRpv3* locus induce cell death in plants carrying *Rpv3*. Cell death induction in leaves from the grapevine varieties *Regent* (*Rpv3.1+*) and *Syrah* (*Rpv3.1-*) 6 days after *Agrobacterium*-mediated expression of effector candidate genes *g166h*, *g166p*, *g165* and *g164*. *Agrobacterium*-mediated expression of  $\beta$ -glucuronidase (*GUS*) was used as negative control for unspecific induction of cell death following agroinfiltration. *Agrobacterium*-mediated expression of *VvMYBA*, leading to the production of anthocyanins, was used as positive control to assess the efficiency of transformation. For *Regent*, the result of two independent experiments out of the four conducted are reported.

*P. viticola* population provides interesting insights into the origin of *avr* alleles. Notably, we found that one *avr* allele, *avr1*, was highly predominant in virulent strains of the *P. viticola* population (80% of the population), including the *vir3.1* strain collected in Switzerland (21). The presence of the *avr1* allele in both Bordeaux (France) and Switzerland suggests the possibility of recurrent mutation at the *avrRpv3.1* locus leading to the emergence of virulent strains. Alternatively, it is possible that the *avr1* allele already preexisted at low frequencies in European populations of *P. viticola*, i.e. before the recent deployment of modern varieties carrying *Rpv3.1*. It should be noted that until the 1950s, French-American hybrids were extensively cultivated in Europe at large scale. It is therefore plausible that the *avr1* allele, selected during that period, has persisted at low frequencies in *P. viticola* populations. Further investigations involving a more extensive survey across Europe would enhance our understanding of allele diversity at the *avrRpv3.1* locus and the prevalence of these alleles in *P. viticola* populations.

In conclusion, our study confirms the effectiveness of

genome-wide association studies (GWAS) in identifying genomic loci involved in both qualitative traits, as illustrated by the discovery of the mating type locus of grapevine downy mildew (20), and quantitative traits, as demonstrated by the description of the locus responsible for the breakdown of a partial resistance in this study. We have shown that the identification of effectors, typically found in rapidly evolving genomic regions, would not have been possible without the utilization of diploid-aware genome assemblies. Our study underscores the advantages of working with diploid-aware genome assemblies, particularly in highly heterozygous genomes like the one of *P. viticola* (19). Looking ahead, the availability of highly accurate long reads, such as HiFi reads (68, 69), will greatly enhance our ability to obtain diploid references at the chromosome level. This advancement holds significant promise for studying genomic evolution in diploid organisms like *P. viticola*. By leveraging such advanced techniques, we can unravel complex genomic traits and deepen our understanding of gene-for-gene interaction. While our current knowledge of the molecular interactions between downy mildew and its host is still in its early stages, our research contributes to expanding this knowledge and opens avenues for further exploration of gene-for-gene interaction in this pathosystem. The recent discoveries regarding the breakdown of the partial resistances *Rpv10* and *Rpv12* in grapevine (21, 22, 26) pave the way for future exploration of new effectors in *P. viticola* using similar approaches.

## Materials and Methods

**Strains and plant materials.** We collected 136 *P. viticola* isolates in 2018 from two plots in Bordeaux vineyards located 5 km from one another (France). Further details about their origin are provided in SI Dataset 1. The monosporangium isolation was carried out as described in (22). After monosporangium isolation, isolates are referred as “strains”. After two weeks of propagation (see supplementary materials), on the day of inoculation, the strains were suspended in sterile water and the density of the suspension was adjusted to  $5 \times 10^3$  sporangia  $ml^{-1}$  in a volume of 120 ml. Two host plants were used for the phenotyping experiment. *Vitis vinifera* cv. Cabernet Sauvignon (*Rpv3.1-*) was chosen as a susceptible host to downy mildew and the variety ‘Regent’ as a partially resistant host carrying the resistance *Rpv3.1* (*Rpv3.1+*). The plants, 75 of each variety, were grafted onto the SO4 rootstock and grown simultaneously in a glasshouse under natural photoperiod conditions, without chemical treatment. The cross-inoculation experiment was conducted on the fourth leaf below the apex (one leaf per plant) which was collected after six months of cultivation.

**Phenotyping experiment.** We inoculated the 136 strains on the susceptible variety *V. vinifera* cv. Cabernet Sauvignon and the resistant variety ‘Regent’. Four ‘mock strains’, consisting of sterile water only, were used as negative controls. For each of the 280 interactions, we performed six replicates. We therefore generated 1680 Plant-Pathogen interactions in total (i.e. grapevine leaf disc inoculated with a *P. viticola* strain) as described in supplementary materials. The leaf-discs were placed in 36 square Petri dishes (23 × 23 cm), with each of the six replicates placed in a different Petri dish. Petri dishes were sealed with Parafilm to maintain relative humidity at 100%. They were then incubated in three growth chambers, paying attention to have the six replicates equally represented in the three different growth chamber, for six days at 18°C under a 12-hour light/12-hour dark photoperiod. Six days post inoculation, all leaf-discs were photographed and the sporulation area per disc determined by image analysis (code available at [https://github.com/ManonPaineau/image\\_analysis\\_P.viticola](https://github.com/ManonPaineau/image_analysis_P.viticola)) as described in (22).

**Genotyping and Genome-Wide Association Study.** The DNA preparation, the sequencing, the variant calling, quality control of the

SNP and the population genetic structure analysis were carried out as described in supplementary materials. The genome-wide association study was performed on the sporulation area quantitative trait using the exact Genome-wide Efficient Mixed Model Association (GEMMA) method (70). The association tests were realized with the relatedness matrix, estimated with the GEMMA software (<http://www.xzlab.org/software.html>), phenotype (average sporulation area value on Regent (Rpv3.1+) for the six replicates) and genotype (filtered SNPs). GEMMA also estimated the proportion of variance in the phenotype explained (PVE) by genotypes. We corrected the significance threshold by the Bonferroni criterion calculated as  $-\log_{10}(\alpha/k)$ , where  $k$  is the number of statistical tests conducted and  $\alpha = 0.05$ . We verified that the model fit our data and correctly accounted for population structure by checking the quantile-quantile plot and the degree of deviation of the genomic inflation factor lambda defined as the median of the resulting chi-squared test statistics divided by the expected median of the chi-squared distribution. The quantile-quantile plots and Manhattan plots were visualized with the R package qqman (71). We analyzed the linkage disequilibrium of the SNPs around the identified loci using the package LDheatmap implemented in R (72).

**Genome reassembly and *avrRpv3.1* locus analysis** Whole genome assembly of Single Molecule Real-Time (SMRT) reads (19) was performed in a two step procedure using the customized FALCON-Unzip pipeline reported in (73) (<https://github.com/andreaminio/FalconUnzip-DClab>). Detail of the assembly procedure are described in supplementary materials. We compared the two INRA-Pv221 assemblies to identify, in the new diploid assembly, the location of the loci identified by GWAS in the consensus reference genome. We used NUCmer with the minimum cluster size  $c=65$  and visualize the result with mummerplot from the MUMmer3 software (74). To evaluate the copy number variation in the locus, the short reads of each sample were aligned separately with bwa mem (version 0.7.17 (75)) on *P. viticola* strain INRA-PV221 FalconUnzip primary assembly and copy number were evaluated on the entire dataset with CNVkit (ver. CNVkit 0.9.9, (76)). To visualize the allelic count, per-base mapping coverage was calculated with samtools depth (version 1.10 (77)), mean coverage value was calculated on windows of 1 kbp in size and normalized on the sample diploid whole genome mean coverage.

**Gene expression analysis.** We investigate the expression of the genes present in the locus *AvrPv3.1* using the available RNA-seq data from (19). Briefly, the RNA were extracted from *Vitis vinifera* cv. Muscat Ottonel leaf after 24, 48 and 72 hours post-inoculation (HPI). For each HPI conditions, three replicates were produced, for a total of nine RNA-seq samples (SRR accession list available in SI Dataset 5). We performed the trimming, the alignment and the quantification of the expression of the transcripts as described in supplementary materials. In order to differentiate reads from *P. viticola* and *V. vinifera*, the paired-end reads were aligned against both genomes of INRA-Pv221, newly assembled with Falcon Unzip in this study, and the first haplotype of *V. vinifera* cv. Cabernet Sauvignon genome v.1.1 (78). The number of reads before and after trimming, and mapping on both genomes are displayed in the SI Dataset 5.

**Protein functional analysis.** BlastP searches were performed at NCBI against the nr protein database. Signal peptides were predicted with SignalPv6.0 (79). Structural similarity searches were performed on Phyre2 (80) and HHPred (81), and displayed with Boxshade. Structural prediction of g166 structure was performed using AlphaFold2 (82) implemented at ColabFold (83) using default settings. Visualization and superimposition of predicted structures was performed on UCSF Chimera X 1.5 (84). The predicted structure of the *P. halstedii* protein was retrieved from the EBI AlphaFold2 database (<https://alphafold.ebi.ac.uk/entry/A0A0P1AQR5>). RNA extraction, cDNA synthesis and PCR were done as in (85). Each sample from infected tissues consisted of 4 leaf discs. Briefly, after RNA extraction, DNase treatment was done using the Invitrogen-Turbo DNA free kit, and first strand cDNA was synthesized using the RevertAid First Strand cDNA synthesis kit (Thermo Scientific). PCR amplifications consisted of 30 cycles of 20 s at 94°C, 20 s at 58°C and 60 s at 72°C, followed by a final extension step of 10 min at 72°C. Primers are listed in SI Dataset 4.

**Transient assay.** The coding sequences of g164, g165 and g166 without the predicted signal peptides were PCR-amplified with Phusion polymerase (NEB) from genomic DNA of *P. viticola* strain Pv221-INRA. Following amplification with primers containing restriction sites, the PCR products were digested (NEB restriction enzymes) and cloned directionally into

plasmid pBIN61. Plasmids were transformed into *E. coli* strain DH10B by electroporation. Qiagen Plasmid Mini Kit was used to extract the plasmids from the *E. coli* cultures, Agrobacterium strain C58C1 carrying the pCH32 plasmid was then transformed by electroporation. Identity of the clones was confirmed by sequencing. Primers used for cloning are listed in SI Dataset 4. Agrobacterium cultures were grown at 28°C in 5 mL of L medium containing kanamycin (50 µg/mL) and tetracycline (2.5 µg/mL). After 2 days, 1 mL of the bacterial suspension was used to inoculate 5 mL of L medium containing kanamycin (50 µg/mL), tetracycline (2.5 µg/mL), 10 mM MES, 150 µM acetosyringone, and grown in the same conditions for one day. Bacterial suspensions were centrifuged and the pellets were resuspended in a solution containing 10 mM MES, 10 mM MgCl<sub>2</sub> and 150 µM acetosyringone. After 2–3 hours of incubation at room temperature, bacterial suspensions were infiltrated at an optical density at 600 nm (OD<sub>600</sub>) of 0.4 using a needleless syringe.

**Data availability.** The sample sequences of *P. viticola* strains were submitted to NCBI SRA with project numbers PRJNA875296. PacBio SMRT reads produced for INRA-PV221 genome assembly were released under the project number PRJNA329579. RNAseq data were released under the project number PRJNA329579.

#### ACKNOWLEDGEMENTS

The authors acknowledge the financial support of the French National Research Agency (ANR) under the grant 20-PCPA-0010 (PPR VITAE), the Comité Interprofessionnel des Vins de Bordeaux, and the French government in the framework of the IdEX Bordeaux University "Investments for the Future" program GPR Bordeaux Plant Sciences. We also would like to thank Pr. Jochen Bogs, Dr Chantal Wingerter and Dr Birgit Eisenmann (Winecampus Neustadt, Germany) for kindly sharing with us the *P. viticola* strains characterized in Wingerter et al. 2021.

#### Bibliography

1. G. Viennot-Bourgin. *Les Champignons Parasites Des Plantes Cultivees. Tome 2*. Masson, Paris, 1949.
2. Mélanie Rouxel, Pere Mestre, Gwenaëlle Comont, Brian L. Lehman, Anniemiek Schilder, and François Delmotte. Phylogenetic and experimental evidence for host-specialized cryptic species in a biotrophic oomycete. *New Phytologist*, 197(1):251–263, 2013. ISSN 1469-8137. doi: 10.1111/nph.12016.
3. Mélanie Rouxel, Pere Mestre, Anton Baudoin, Odile Carisse, Laurent Delière, Michael A. Ellis, David Gadoury, Jiang Lu, Mizuho Nita, Sylvie Richard-Cervera, Anniemiek Schilder, Alice Wise, and François Delmotte. Geographic Distribution of Cryptic Species of *Plasmopara viticola* Causing Downy Mildew on Wild and Cultivated Grape in Eastern North America. *Phytopathology*, 104(7):692–701, July 2014. ISSN 0031-949X. doi: 10.1094/PHYTO-08-13-0225-R. Publisher: Scientific Societies.
4. Michael C. Fontaine, Frédéric Austerlitz, Tatiana Giraud, Frédéric Labbé, Daciana Papura, Sylvie Richard-Cervera, and François Delmotte. Genetic signature of a range expansion and leap-frog event after the recent invasion of Europe by the grapevine downy mildew pathogen *Plasmopara viticola*. *Molecular Ecology*, 22(10): 2771–2786, 2013. ISSN 1365-294X. doi: <https://doi.org/10.1111/mec.12293>. [\\_eprint: https://onlinelibrary.wiley.com/doi/pdf/10.1111/mec.12293](https://onlinelibrary.wiley.com/doi/pdf/10.1111/mec.12293).
5. Michael C. Fontaine, Frédéric Labbé, Yann Dussert, Laurent Delière, Sylvie Richard-Cervera, Tatiana Giraud, and François Delmotte. Europe as a bridgehead in the worldwide invasion history of grapevine downy mildew, *Plasmopara viticola*. *Current Biology*, 31(10): 2155–2166.e4, May 2021. ISSN 0960-9822. doi: 10.1016/j.cub.2021.03.009.
6. Silvia Venuti, Dario Copetti, Serena Foria, Luigi Falginiella, Sarolta Hoffmann, Diana Bellin, Petar Cindrić, Pál Kozma, Simone Scalabrini, Michele Morgante, Raffaele Testolin, and Gabriele Di Gasparo. Historical Introgression of the Downy Mildew Resistance Gene Rpv12 from the Asian Species *Vitis amurensis* into Grapevine Varieties. *PLOS ONE*, 8(4):e61228, 2013. ISSN 1932-6203. doi: 10.1371/journal.pone.0061228.
7. Didier Merdinoglu, Christophe Schneider, Emille Prado, Sabine Wiedemann-Merdinoglu, and Pere Mestre. Breeding for durable resistance to downy and powdery mildew in grapevine. 1, 52(3):203–209, August 2018. ISSN 2494-1271. doi: 10.20870/oenone.2018.52.3.2116.
8. Maul. *Vitis International Variety Catalogue*, 2021.
9. Didier Merdinoglu, Sabine Wiedemann-Merdinoglu, Pascale Coste, Vincent Dumas, Stephanie Haetty, Gisele Butterlin, and Charles Greif. Genetic Analysis of Downy Mildew Resistance Derived from *Muscadinia rotundifolia*. *Acta horticulturae*, 2003. ISSN 0567-7572.
10. Leocir J. Welter, Nilgün Göktürk-Baydar, Murat Akkurt, Erika Maul, Rudolf Eibach, Reinhard Töpfer, and Eva M. Zyprian. Genetic mapping and localization of quantitative trait loci affecting fungal disease resistance and leaf morphology in grapevine (*Vitis vinifera* L.). *Mol Breeding*, 20(4):359–374, November 2007. ISSN 1572-9788. doi: 10.1007/s11032-007-9097-7.
11. Diana Bellin, Elisa Peressotti, Didier Merdinoglu, Sabine Wiedemann-Merdinoglu, Anne-Françoise Adam-Blondon, Guido Cipriani, Michele Morgante, Raffaele Testolin, and Gabriele Di Gasparo. Resistance to *Plasmopara viticola* in grapevine 'Bianca' is controlled by a major dominant gene causing localised necrosis at the infection site. *Theor Appl Genet*, 120(1):163–176, December 2009. ISSN 1432-2242. doi: 10.1007/s00122-009-1167-2.
12. Gabriele Di Gasparo, Dario Copetti, Courtney Coleman, Simone Diego Castellari, Rudolf Eibach, Pál Kozma, Thierry Lacombe, Gregory Gambetta, Andrey Zvyagin, Petar Cindrić, László Kovács, Michele Morgante, and Raffaele Testolin. Selective sweep at the Rpv3



- locus during grapevine breeding for downy mildew resistance. *Theor Appl Genet*, 124(2): 277–286, February 2012. ISSN 1432-2242. doi: 10.1007/s00122-011-1703-8.
13. Florian Schwander, Rudolf Eibach, Iris Fechter, Ludger Hausmann, Eva Zyrpian, and Reinhard Töpfer. Rpv10: a new locus from the Asian *Vitis* gene pool for pyramiding downy mildew resistance loci in grapevine. *Theor Appl Genet*, 124(1):163–176, January 2012. ISSN 1432-2242. doi: 10.1007/s00122-011-1695-4.
  14. European Commission. Commission Implementing Regulation (EU) 2018/1981 of 13 December 2018 Renewing the Approval of the Active Substances Copper Compounds, as Candidates for Substitution, in Accordance with Regulation (EC) No 1107/2009 of the European Parliament and of the Council Concerning the Placing of Plant Protection Products on the Market, and Amending the Annex to Commission Implementing Regulation (EU) No 540/2011., 2018. Available online: [http://data.europa.eu/eli/reg\\_impl/2018/1981/oj](http://data.europa.eu/eli/reg_impl/2018/1981/oj) (accessed on 30 May 2023).
  15. Wei-Jen Chen, François Delmotte, Sylvie Richard Cervera, Lisette Douence, Charles Greif, and Marie-France Corio-Costet. At Least Two Origins of Fungicide Resistance in Grapevine Downy Mildew Populations. *Appl Environ Microbiol*, 73(16):5162–5172, August 2007. ISSN 0099-2240. doi: 10.1128/AEM.00507-07.
  16. Mathias Blum, Maya Waldner, and Ulrich Gisi. A single point mutation in the novel PvcAsA3 gene confers resistance to the carboxylic acid amide fungicide mandipropamid in *Plasmopara viticola*. *Fungal genetics and biology: FG & B*, 47(6):499–510, June 2010. ISSN 1096-0937. doi: 10.1016/j.fgb.2010.02.009.
  17. Chloé E. L. Delmas, Frédéric Fabre, Jérôme Jolivet, Isabelle D. Mazet, Sylvie Richard Cervera, Laurent Delière, and François Delmotte. Adaptation of a plant pathogen to partial host resistance: selection for greater aggressiveness in grapevine downy mildew. *Evolutionary Applications*, 9(5):709–725, 2016. ISSN 1752-4571. doi: 10.1111/eva.12368.
  18. Cesare Gessler, Ilaria Pertot, and Michele Perazzolli. *Plasmopara viticola*: a review of knowledge on downy mildew of grapevine and effective disease management. *Phytopathologia Mediterranea*, 50(1):3–44, May 2011. ISSN 1593-2095. doi: 10.14601/Phytopathol\_Mediterr-9360.
  19. Yann Dussert, Isabelle D. Mazet, Carole Couture, Jérôme Gouzy, Marie-Christine Piron, Claire Kuchly, Olivier Bouchez, Claude Rispé, Pere Mestre, and François Delmotte. A High-Quality Grapevine Downy Mildew Genome Assembly Reveals Rapidly Evolving and Lineage-Specific Putative Host Adaptation Genes. *Genome Biol Evol*, 11(3):954–969, March 2019. doi: 10.1093/gbe/evz048.
  20. Yann Dussert, Ludovic Legrand, Isabelle D. Mazet, Carole Couture, Marie-Christine Piron, Rémy-Félix Serre, Olivier Bouchez, Pere Mestre, Silvia Laura Toffolatti, Tatiana Giraud, and François Delmotte. Identification of the First Oomycete Mating-type Locus Sequence in the Grapevine Downy Mildew Pathogen, *Plasmopara viticola*. *Current Biology*, 30(20): 3897–3907.e4, October 2020. ISSN 0960-9822. doi: 10.1016/j.cub.2020.07.057. Publisher: Elsevier.
  21. Chantal Wingerter, Birgit Eisenmann, Patricia Weber, Ian Dry, and Jochen Bogs. Grapevine Rpv3-, Rpv10- and Rpv12-mediated defense responses against *Plasmopara viticola* and the impact of their deployment on fungicide use in viticulture. *BMC Plant Biology*, 21(1): 470, October 2021. ISSN 1471-2229. doi: 10.1186/s12870-021-03228-7.
  22. Manon Paineau, Isabelle D. Mazet, Sabine Wiedemann-Merdinoglu, Frédéric Fabre, and François Delmotte. The Characterization of Pathotypes in Grapevine Downy Mildew Provides Insights into the Breakdown of Rpv3, Rpv10, and Rpv12 Factors in Grapevines. *Phytopathology*, 112(11):2329–2340, November 2022. ISSN 0031-949X. doi: 10.1094/PHYTO-11-21-0458-R. Publisher: Scientific Societies.
  23. Elisa Peressotti, Sabine Wiedemann-Merdinoglu, François Delmotte, Diana Bellin, Gabriele Di Gaspero, Raffaele Testolin, Didier Merdinoglu, and Pere Mestre. Breakdown of resistance to grapevine downy mildew upon limited deployment of a resistant variety. *BMC Plant Biol*, 10:147, July 2010. ISSN 1471-2229. doi: 10.1186/1471-2229-10-147.
  24. François Delmotte, Pere Mestre, Christophe Schneider, Hanns-Heinz Kassemeyer, Pál Kozma, Sylvie Richard-Cervera, Mélanie Rouxel, and Laurent Delière. Rapid and multi-regional adaptation to host partial resistance in a plant pathogenic oomycete: evidence from European populations of *Plasmopara viticola*, the causal agent of grapevine downy mildew. *Infect. Genet. Evol.*, 27:500–508, October 2014. ISSN 1567-7257. doi: 10.1016/j.meegid.2013.10.017.
  25. Javier Gómez-Zeledón, Markus Kaiser, and Otmar Spring. Exploring host-pathogen combinations for compatible and incompatible reactions in grapevine downy mildew. *European Journal of Plant Pathology*, 149(1):1–10, September 2017. ISSN 1573-8469. doi: 10.1007/s10658-017-1156-2.
  26. Lisa Heyman, Rebecca Höfte, Anna Kicherer, Oliver Trapp, Essaid Ait Barka, Reinhard Töpfer, and Monica Höfte. The Durability of Quantitative Host Resistance and Variability in Pathogen Virulence in the Interaction Between European Grapevine Cultivars and *Plasmopara viticola*. *Front. Agron.*, 3, 2021. ISSN 2673-3218. doi: 10.3389/fragr.2021.684023. Publisher: Frontiers.
  27. G. Di Gaspero, G. Cipriani, A.-F. Adam-Blondon, and R. Testolin. Linkage maps of grapevine displaying the chromosomal locations of 420 microsatellite markers and 82 markers for R-gene candidates. *Theor Appl Genet*, 114(7):1249–1263, May 2007. ISSN 1432-2242. doi: 10.1007/s00122-007-0516-2.
  28. Marco Moroldo, Sophie Paillard, Raffaella Marconi, Legeai Fabrice, Aurelie Canaguier, Corinne Craud, Veronique De Berardinis, Cecile Guichard, Veronique Brunaud, Isabelle Le Clairche, Simone Scalabrin, Raffaele Testolin, Gabriele Di Gaspero, Michele Morgante, and Anne-Françoise Adam-Blondon. A physical map of the heterozygous grapevine ‘Cabernet Sauvignon’ allows mapping candidate genes for disease resistance. *BMC Plant Biology*, 8(1):66, June 2008. ISSN 1471-2229. doi: 10.1186/1471-2229-8-66.
  29. Angela Feechan, Claire Anderson, Laurent Trogrosca, Angelica Jermakow, Pere Mestre, Sabine Wiedemann-Merdinoglu, Didier Merdinoglu, Amanda R. Walker, Lance Cadle-Davidson, Bruce Reisch, Sebastien Aubourg, Nadia Bentahar, Bipna Shrestha, Alain Bouquet, Anne-Françoise Adam-Blondon, Mark R. Thomas, and Ian B. Dry. Genetic dissection of a TIR-NB-LRR locus from the wild North American grapevine species *Muscadinia rotundifolia* identifies paralogous genes conferring resistance to major fungal and oomycete pathogens in cultivated grapevine. *The Plant Journal*, 76(4):661–674, 2013. ISSN 1365-313X. doi: 10.1111/tpj.12327.
  30. Serena Foria, Dario Copetti, Birgit Eisenmann, Gabriele Magris, Michele Vidotto, Simone Scalabrin, Raffaele Testolin, Guido Cipriani, Sabine Wiedemann-Merdinoglu, Jochen Bogs, Gabriele Di Gaspero, and Michele Morgante. Gene duplication and transposition of mobile elements drive evolution of the Rpv3 resistance locus in grapevine. *The Plant Journal*, 101(3):529–542, 2020. ISSN 1365-313X. doi: 10.1111/tpj.14551. Number: 3 \_eprint: <https://onlinelibrary.wiley.com/doi/pdf/10.1111/tpj.14551>.
  31. Ryan G. Anderson, Devdutta Deb, Kevin Fedkenheuer, and John M. McDowell. Recent Progress in RXLR Effector Research. *Mol. Plant-Microbe Interact.*, 28(10):1063–1072, October 2015. ISSN 0894-0282. doi: 10.1094/MPMI-01-15-0022-CR. Number: 10 WOS:000363361100001.
  32. Jinqiu He, Wenwu Ye, Du Seok Choi, Baixing Wu, Yi Zhai, Baodan Guo, Shuyi Duan, Yuan-chao Wang, Jianhua Gan, Wenbo Ma, and Jinbiao Ma. Structural analysis of Phytophthora suppressor of RNA silencing 2 (PSR2) reveals a conserved modular fold contributing to virulence. *Proc. Natl. Acad. Sci. U. S. A.*, 116(16):8054–8059, April 2019. ISSN 0027-8424. doi: 10.1073/pnas.1819481116. Number: 16 WOS:000464767500067.
  33. Lida Derevnina, Sebastian Chin-Wo-Reyes, Frank Martin, Kelsey Wood, Lutz Froenicke, Otmar Spring, and Richard Michelmore. Genome Sequence and Architecture of the Tobacco Downy Mildew Pathogen *Peronospora tabacina*. *Mol Plant Microbe Interact*, 28(11):1198–1215, November 2015. ISSN 0894-0282. doi: 10.1094/MPMI-05-15-0112-R. Number: 11.
  34. Rahul Sharma, Xiaojuan Xia, Liliana M. Cano, Edouard Evangelisti, Eric Kemen, Howard Judelson, Stan Oome, Christine Sambles, D. Johan van den Hoogen, Miloslav Kitner, Joel Klein, Harold J. G. Meijer, Otmar Spring, John Win, Reinhard Zipper, Helge B. Bode, Francine Govers, Sophien Kamoun, Sebastian Schornack, David J. Studholme, Guido Van den Ackerveken, and Marco Thines. Genome analyses of the sunflower pathogen *Plasmopara halstedii* provide insights into effector evolution in downy mildews and Phytophthora. *BMC Genomics*, 16, October 2015. ISSN 1471-2164. doi: 10.1186/s12864-015-1904-7. WOS:000362253000002.
  35. Maud Combiere, Edouard Evangelisti, Marie-Christine Piron, David Rengel, Ludovic Legrand, Liron Shenhav, Olivier Bouchez, Sebastian Schornack, and Pere Mestre. A secreted WY-domain-containing protein present in European isolates of the oomycete *Plasmopara viticola* induces cell death in grapevine and tobacco species. *PLoS One*, 14(7): e0220184, July 2019. ISSN 1932-6203. doi: 10.1371/journal.pone.0220184. Number: 7 WOS:000484047000020.
  36. Kelsey J. Wood, Munir Nur, Juliana Gil, Kyle Fletcher, Kim Lakeman, Dasan Gann, Ayumi Gotthberg, Tina Khuu, Jennifer Kopetzky, Sanye Naqvi, Archana Pandya, Chi Zhang, Brigitte Maisonneuve, Mathieu Pel, and Richard Michelmore. Effector prediction and characterization in the oomycete pathogen *Bremia lactucae* reveal host-recognized WY domain proteins that lack the canonical RXLR motif. *PLoS Pathog.*, 16(10), October 2020. ISSN 1553-7366. doi: 10.1371/journal.ppat.1009012. Number: 10 Place: San Francisco Publisher: Public Library Science WOS:000586727500001.
  37. P. Mestre, S. Carrere, J. Gouzy, M.-C. Piron, D. Tourville de Labroue, P. Vincourt, F. Delmotte, and L. Godiard. Comparative analysis of expressed CRN and RXLR effectors from two *Plasmopara* species causing grapevine and sunflower downy mildew. *Plant Pathology*, 65(5):767–781, 2016. ISSN 1365-3059. doi: 10.1111/ppa.12469.
  38. Matteo Brillì, Elisa Asquini, Mirko Moser, Pier Luigi Bianchedi, Michele Perazzolli, and Azeddine Si-Ammour. A multi-omics study of the grapevine-downy mildew (*Plasmopara viticola*) pathosystem unveils a complex protein coding- and noncoding-based arms race during infection. *Sci Rep*, 8(1):757, January 2018. ISSN 2045-2322. doi: 10.1038/s41598-018-19158-8. Bandiera\_abtest: a Cc\_license\_type: cc\_by Cg\_type: Nature Research Journals Number: 1 Primary\_atype: Research Publisher: Nature Publishing Group Subject\_term: Effectors in plant pathology;Plant molecular biology;Small RNAs;Transcriptomics Subject\_term\_id: effectors-in-plant-pathology;plant-molecular-biology;small-rnas;transcriptomics.
  39. Xuejiao Lei, Xia Lan, Wenxiu Ye, Yunxiao Liu, Shiren Song, and Jiang Lu. *Plasmopara viticola* effector PVRXLR159 suppresses immune responses in *Nicotiana benthamiana*. *Plant Signal. Behav.*, 14(12):1682220, December 2019. ISSN 1559-2316. doi: 10.1080/15592324.2019.1682220. WOS:000492306100001.
  40. Xia Lan, Yunxiao Liu, Shiren Song, Ling Yin, Jiang Xiang, Junjie Qu, and Jiang Lu. *Plasmopara viticola* effector PVRXLR131 suppresses plant immunity by targeting plant receptor-like kinase inhibitor BK1. *Mol Plant Pathol*, 20(6):765–783, April 2019. ISSN 1464-6722. doi: 10.1111/mpp.12790.
  41. Tao Ma, Shuyun Chen, Jiaqi Liu, Peining Fu, Wei Wu, Shiren Song, Yu Gao, Wenxiu Ye, and Jiang Lu. *Plasmopara viticola* effector PVRXLR111 stabilizes VvWRKY40 to promote virulence. *Molecular Plant Pathology*, 22(2):231–242, 2021. ISSN 1364-3703. doi: 10.1111/mpp.13020. \_eprint: <https://onlinelibrary.wiley.com/doi/pdf/10.1111/mpp.13020>.
  42. Jiaqi Liu, Shuyun Chen, Tao Ma, Yu Gao, Shiren Song, Wenxiu Ye, and Jiang Lu. *Plasmopara viticola* effector PVRXLR53 suppresses innate immunity in *Nicotiana benthamiana*. *Plant Signal Behav.*, 16(2):1846927, February 2021. ISSN 1559-2324. doi: 10.1080/15592324.2020.1846927.
  43. Karen Casagrande, Luigi Falginella, Simone Diego Castellarin, Raffaele Testolin, and Gabriele Di Gaspero. Defence responses in Rpv3-dependent resistance to grapevine downy mildew. *Planta*, 234(6):1097–1109, December 2011. ISSN 1432-2048. doi: 10.1007/s00425-011-1461-5.
  44. Yuanyuan Gao, Zhaohui Liu, Justin D. Faris, Jonathan Richards, Robert S. Brueggeman, Xuehui Li, Richard P. Oliver, Bruce A. McDonald, and Timothy L. Friesen. Validation of Genome-Wide Association Studies as a Tool to Identify Virulence Factors in *Parastagonospora nodorum*. *Phytopathology*, 106(10):1177–1185, October 2016. ISSN 0031-949X. doi: 10.1094/PHYTO-02-16-0113-FI. Publisher: Scientific Societies.
  45. Ziming Zhong, Thierry C. Marcel, Fanny E. Hartmann, Xin Ma, Clémence Plissonneau, Marcello Zala, Aurélie Ducasse, Johann Confais, Jérôme Compain, Nicolas Lapalu, Joëlle Amselem, Bruce A. McDonald, Daniel Croll, and Javier Palma-Guerrero. A small secreted protein in *Zymoseptoria tritici* is responsible for avirulence on wheat cultivars carrying the *Stb6* resistance gene. *New Phytologist*, 214(2):619–631, 2017. ISSN 1469-8137. doi: 10.1111/nph.14434.
  46. Fanny E. Hartmann, Bruce A. McDonald, and Daniel Croll. Genome-wide evidence for di-



- vergent selection between populations of a major agricultural pathogen. *Molecular Ecology*, 27(12):2725–2741, 2018. ISSN 1365-294X. doi: 10.1111/mec.14711. [\\_eprint: https://onlinelibrary.wiley.com/doi/pdf/10.1111/mec.14711](https://onlinelibrary.wiley.com/doi/pdf/10.1111/mec.14711).
47. Marisa E. Miller, Eric S. Nazareno, Susan M. Rottschaefer, Jakob Riddle, Danilo Dos Santos Pereira, Feng Li, Hoa Nguyen-Phuc, Eva C. Henningsen, Antoine Persoons, Diane G. O. Saunders, Eva Stukenbrock, Peter N. Dodds, Shahyar F. Kianian, and Melania Figueroa. Increased virulence of *Puccinia coronata* f. sp. *avenae* populations through allele frequency changes at multiple putative Avr loci. *PLOS Genetics*, 16(12):e1009291, December 2020. ISSN 1553-7404. doi: 10.1371/journal.pgen.1009291. Publisher: Public Library of Science.
  48. Huyen T. T. Phan, Eiko Furuki, Lukas Hunziker, Kasia Rybak, and Kar-Chun Tan. GWAS analysis reveals distinct pathogenicity profiles of Australian *Parastagonospora nodorum* isolates and identification of marker-trait-associations to septoria nodorum blotch. *Sci Rep*, 11(1):10085, May 2021. ISSN 2045-2322. doi: 10.1038/s41598-021-87829-0. Bandiera\_abtest: a Cc\_license\_type: cc\_by Cg\_type: Nature Research Journals Number: 1 Primary\_atype: Research Publisher: Nature Publishing Group Subject\_term: Plant breeding;Plant genetics;Plant stress responses Subject\_term\_id: plant-breeding;plant-genetics;plant-stress-responses.
  49. Nikhil Kumar Singh, Thomas Badet, Leen Abraham, and Daniel Croll. Rapid sequence evolution driven by transposable elements at a virulence locus in a fungal wheat pathogen. *BMC Genomics*, 22(1):393, 2021. ISSN 1471-2164. doi: 10.1186/s12864-021-07691-2.
  50. Gayan K. Kariyawasam, Jonathan K. Richards, Nathan A. Wyatt, Katherine L. D. Running, Steven S. Xu, Zhaohui Liu, Pawel Borowicz, Justin D. Faris, and Timothy L. Friesen. The *Parastagonospora nodorum* necrotrophic effector SnTox5 targets the wheat gene Snn5 and facilitates entry into the leaf mesophyll. *New Phytologist*, 233(1):409–426, 2022. ISSN 1469-8137. doi: 10.1111/nph.17602. [\\_eprint: https://onlinelibrary.wiley.com/doi/pdf/10.1111/nph.17602](https://onlinelibrary.wiley.com/doi/pdf/10.1111/nph.17602).
  51. Antoine Persoons, Agathe Maupetit, Clémentine Louet, Axelle Andrieux, Anna Lipzen, Kerrie W Barry, Hyunsoo Na, Catherine Adam, Igor V Grigoriev, Vincent Segura, Sébastien Duplessis, Pascal Frey, Fabien Halkett, and Stéphane De Mita. Genomic Signatures of a Major Adaptive Event in the Pathogenic Fungus *Melampsora larici-populina*. *Genome Biology and Evolution*, 14(1):evab279, January 2022. ISSN 1759-6653. doi: 10.1093/gbe/evab279.
  52. Muhammad Irfan Siddique, Hea-Young Lee, Na-Young Ro, Koeun Han, Jelli Venkatesh, Abate Mekonnen Solomon, Abhinandan Surgonda Patil, Amornrat Changkwan, Jin-Kyung Kwon, and Byoung-Cheori Kang. Identifying candidate genes for Phytophthora capsici resistance in pepper (*Capsicum annuum*) via genotyping-by-sequencing-based QTL mapping and genome-wide association study. *Scientific Reports*, 9(1):1–15, July 2019. ISSN 2045-2322. doi: 10.1038/s41598-019-46342-1.
  53. Chen-Shan Chin, Paul Peluso, Fritz J. Sedlacek, Maria Nattestad, Gregory T. Concepcion, Alicia Clum, Christopher Dunn, Ronan O'Malley, Rosa Figueroa-Balderas, Abraham Morales-Cruz, Grant R. Cramer, Massimo Delledonne, Chongyuan Luo, Joseph R. Ecker, Dario Cantu, David R. Rank, and Michael C. Schatz. Phased diploid genome assembly with single-molecule real-time sequencing. *Nat Methods*, 13(12):1050–1054, December 2016. ISSN 1548-7105. doi: 10.1038/nmeth.4035.
  54. Yann Dussert, Jérôme Gouzy, Sylvie Richard-Cervera, Isabelle D. Mazet, Laurent Delière, Carole Couture, Ludovic Legrand, Marie-Christine Piron, Pere Mestre, and François Delmotte. Draft Genome Sequence of *Plasmopara viticola*, the Grapevine Downy Mildew Pathogen. *Genome Announc*, 4(5):e00987–16, October 2016. ISSN 2169-8287. doi: 10.1128/genomeA.00987-16.
  55. Lida Derevnina, Mauricio P. Contreras, Hiroaki Adachi, Jessica Upson, Angel Vergara Cruces, Rongrong Xie, Jan Sklenar, Frank L. H. Menke, Sam T. Mugford, Dan MacLean, Wenbo Ma, Saskia Hogenhout, Aska Goverse, Abbas Maqbool, Chih-Hang Wu, and Sophien Kamoun. Plant pathogens convergently evolved to counteract redundant nodes of an NLR immune receptor network. *PLoS Biol*, 19(8):e3001136, August 2021. ISSN 1544-9173. doi: 10.1371/journal.pbio.3001136. Number: 8 Place: San Francisco Publisher: Public Library Science WOS:000687405700001.
  56. Serena Foria, Gabriele Magris, Irena Jurman, Rachel Schwoppe, Massimo De Candido, Elisa De Luca, Dragoslav Ivanisevic, Michele Morgante, and Gabriele Di Gasparo. Extent of wild-to-crop interspecific introgression in grapevine (*Vitis vinifera*) as a consequence of resistance breeding and implications for the crop species definition. *Hortic. Res.-England*, 9:uhab010, January 2022. ISSN 2662-6810. doi: 10.1093/hr/uhab010. Place: Cary Publisher: Oxford Univ Press Inc WOS:000791049400003.
  57. Guillaume Daverdin, Thierry Rouxel, Lilian Gout, Jean-Noël Aubertot, Isabelle Fudal, Michel Meyer, Francis Parlange, Julien Carpezat, and Marie-Hélène Balesdent. Genome Structure and Reproductive Behaviour Influence the Evolutionary Potential of a Fungal Phytopathogen. *PLOS Pathogens*, 8(11):e1003020, November 2012. ISSN 1553-7374. doi: 10.1371/journal.ppat.1003020. Publisher: Public Library of Science.
  58. Clémentine Louet, Méline Saubin, Axelle Andrieux, Antoine Persoons, Mathilde Gorse, Jérémy Pétrowski, Bénédicte Fabre, Stéphane De Mita, Sébastien Duplessis, Pascal Frey, and Fabien Halkett. A point mutation and large deletion at the candidate avirulence locus AvrMip7 in the poplar rust fungus correlate with poplar RMP7 resistance breakdown. *Molecular Ecology*, n/a(n/a), 2021. ISSN 1365-294X. doi: 10.1111/mec.16294. [\\_eprint: https://onlinelibrary.wiley.com/doi/pdf/10.1111/mec.16294](https://onlinelibrary.wiley.com/doi/pdf/10.1111/mec.16294).
  59. Mareike Möller and Eva H. Stukenbrock. Evolution and genome architecture in fungal plant pathogens. *Nat Rev Microbiol*, 15(12):756–771, December 2017. ISSN 1740-1534. doi: 10.1038/nrmicro.2017.76. Bandiera\_abtest: a Cg\_type: Nature Research Journals Number: 12 Primary\_atype: Reviews Publisher: Nature Publishing Group Subject\_term: Fungal biology;Fungal genetics;Fungal pathogenesis;Genetic variation Subject\_term\_id: fungal-biology;fungal-genetics;fungal-pathogenesis;genetic-variation.
  60. Alex Z. Zaccaron, Li-Hung Chen, Anastasios Samaras, and Ioannis Stergiopoulos. A chromosome-scale genome assembly of the tomato pathogen *Cladosporium fulvum* reveals a compartmentalized genome architecture and the presence of a dispensable chromosome. *Microb Genom*, 8(4):000819, April 2022. ISSN 2057-5858. doi: 10.1099/mgen.0.000819.
  61. Simone Fouché, Thomas Badet, Ursula Oggenfuss, Clémence Plissonneau, Carolina Sardinha Francisco, and Daniel Croll. Stress-Driven Transposable Element Depression Dynamics and Virulence Evolution in a Fungal Pathogen. *Mol Biol Evol*, 37(1):221–239, January 2020. ISSN 1537-1719. doi: 10.1093/molbev/msz216.
  62. Chen Wang, Andrew W. Milgate, Peter S. Solomon, and Megan C. McDonald. The identification of a transposon affecting the asexual reproduction of the wheat pathogen *Zymoseptoria tritici*. *Mol Plant Pathol*, 22(7):800–816, July 2021. ISSN 1364-3703. doi: 10.1111/mpp.13064.
  63. Guillaume Bourque, Kathleen H. Burns, Mary Gehring, Vera Gorbunova, Andrei Seluanov, Mouly Hammell, Michaël Imbeault, Zsuzsanna Izsák, Henry L. Levin, Todd S. Macfarlan, Dixie L. Mager, and Cédric Feschotte. Ten things you should know about transposable elements. *Genome Biology*, 19(1):199, November 2018. ISSN 1474-760X. doi: 10.1186/s13059-018-1577-z.
  64. Anna Muszewska, Kamil Steczkiewicz, Marta Stepniowska-Dziubinska, and Krzysztof Ginalski. Transposable elements contribute to fungal genes and impact fungal lifestyle. *Sci Rep*, 9(1):4307, March 2019. ISSN 2045-2322. doi: 10.1038/s41598-019-40965-0. Number: 1 Publisher: Nature Publishing Group.
  65. Loup Rimbaud, Frédéric Fabre, Julien Papaix, Benoît Moury, Christian Lannou, Luke G. Barrett, and Peter H. Thrall. Models of Plant Resistance Deployment. *Annual Review of Phytopathology*, 59(1):null, 2021. doi: 10/gktgjq. [\\_eprint: https://doi.org/10.1146/annurev-phyto-020620-122134](https://doi.org/10.1146/annurev-phyto-020620-122134).
  66. Marta Zaffaroni, Loup Rimbaud, Jean-François Rey, Julien Papaix, and Frédéric Fabre. Effects of pathogen sexual reproduction on the evolutionary and epidemiological control provided by deployment strategies for two major resistance genes in agricultural landscapes. *bioRxiv*, 2023. doi: 10.1101/2023.02.02.526796.
  67. Guillaume Daverdin, Thierry Rouxel, Lilian Gout, Jean-Noël Aubertot, Isabelle Fudal, Michel Meyer, Francis Parlange, Julien Carpezat, and Marie-Hélène Balesdent. Genome Structure and Reproductive Behaviour Influence the Evolutionary Potential of a Fungal Phytopathogen. *PLoS Pathog*, 8(11):e1003020, November 2012. doi: 10.1371/journal.ppat.1003020.
  68. Haoyu Cheng, Erich D. Jarvis, Olivier Fedrigo, Klaus-Peter Koeplli, Lara Urban, Neil J. Gemmill, and Heng Li. Haplotype-resolved assembly of diploid genomes without parental data. *Nat Biotechnol*, 40(9):1332–1335, September 2022. ISSN 1546-1696. doi: 10.1038/s41587-022-01261-x. Number: 9 Publisher: Nature Publishing Group.
  69. Haoyu Cheng, Gregory T. Concepcion, Xiaowen Feng, Haowen Zhang, and Heng Li. Haplotype-resolved de novo assembly using phased assembly graphs with hifiasm. *Nat Methods*, 18(2):170–175, February 2021. ISSN 1548-7105. doi: 10.1038/s41592-020-01056-5. Number: 2 Publisher: Nature Publishing Group.
  70. Xiang Zhou and Matthew Stephens. Genome-wide efficient mixed-model analysis for association studies. *Nat Genet*, 44(7):821–824, July 2012. ISSN 1546-1718. doi: 10.1038/ng.2310. Bandiera\_abtest: a Cg\_type: Nature Research Journals Number: 7 Primary\_atype: Research Publisher: Nature Publishing Group Subject\_term: Computational models;Genome-wide association studies Subject\_term\_id: computational-models;genome-wide-association-studies.
  71. Stephen D. Turner. qqman: an R package for visualizing GWAS results using Q-Q and manhattan plots. *Journal of Open Source Software*, 3(25):731, May 2018. ISSN 2475-9066. doi: 10.21105/joss.00731.
  72. J.-H. Shin, S. Blay, B. McNeney, and J. Graham. LDheatmap: An R Function for Graphical Display of Pairwise Linkage Disequilibrium Between Single Nucleotide Polymorphisms. 16: {Code Snippet 3}, 2006.
  73. Andrea Minio, Mélanie Massonnet, Rosa Figueroa-Balderas, Alvaro Castro, and Dario Cantu. Diploid Genome Assembly of the Wine Grape *Carménère*. *G3 Genes/Genomes/Genetics*, 9(5):1331–1337, May 2019. ISSN 2160-1836. doi: 10.1534/g3.119.400030.
  74. S. Kurtz, A. Phillippy, A.L. Delcher, M. Smoot, M. Shumway, C. Antonescu, and S.L. Salzberg. Versatile and open software for comparing large genomes. *Genome biology*, 5(2), 2004. ISSN 1545-6914.
  75. Heng Li. Aligning sequence reads, clone sequences and assembly contigs with BWA-MEM. *arXiv:1303.3997 [q-bio]*, May 2013. arXiv: 1303.3997.
  76. Eric Talevich, A. Hunter Shain, Thomas Botton, and Boris C. Bastian. CNVkit: Genome-Wide Copy Number Detection and Visualization from Targeted DNA Sequencing. *PLOS Computational Biology*, 12(4):e1004873, 2016. ISSN 1553-7358. doi: 10.1371/journal.pcbi.1004873. Publisher: Public Library of Science.
  77. Heng Li, Bob Handsaker, Alec Wysoker, Tim Fennell, Jue Ruan, Nils Homer, Gabor Marth, Goncalo Abecasis, Richard Durbin, and 1000 Genome Project Data Processing Subgroup. The Sequence Alignment/Map format and SAMtools. *Bioinformatics*, 25(16):2078–2079, 2009. ISSN 1367-4803. doi: 10.1093/bioinformatics/btp352.
  78. Mélanie Massonnet, Noé Cochetel, Andrea Minio, Amanda M. Vondras, Jerry Lin, Aline Muyle, Jadrán F. Garcia, Yongfeng Zhou, Massimo Delledonne, Summaria Riaz, Rosa Figueroa-Balderas, Brandon S. Gaut, and Dario Cantu. The genetic basis of sex determination in grapes. *Nat Commun*, 11(1):2902, June 2020. ISSN 2041-1723. doi: 10.1038/s41467-020-16700-z. Number: 1 Publisher: Nature Publishing Group.
  79. Felix Teufel, José Juan Almagro Armenteros, Alexander Rosenberg Johansen, Magnús Halldór Gíslason, Silas Irby Pihl, Konstantinos D. Tsirogios, Ole Winther, Søren Brunak, Gunnar von Heijne, and Henrik Nielsen. SignalP 6.0 predicts all five types of signal peptides using protein language models. *Nat Biotechnol*, 40(7):1023–1025, July 2022. ISSN 1546-1696. doi: 10.1038/s41587-021-01156-3. Number: 7 Publisher: Nature Publishing Group.
  80. Lawrence A. Kelley, Stefans Mezulis, Christopher M. Yates, Mark N. Wass, and Michael J. E. Sternberg. The PyMol web portal for protein modeling, prediction and analysis. *Nat Protoc*, 10(6):845–858, June 2015. ISSN 1750-2799. doi: 10.1038/nprot.2015.053. Number: 6 Publisher: Nature Publishing Group.
  81. Manolo Gouy, Stéphane Guindon, and Olivier Gascuel. SeaView version 4: A multiplatform graphical user interface for sequence alignment and phylogenetic tree building. *Mol. Biol. Evol.*, 27(2):221–224, February 2010. ISSN 1537-1719. doi: 10.1093/molbev/msp259. Number: 2.
  82. John Juniper, Richard Evans, Alexander Pritzel, Tim Green, Michael Figurnov, Olaf Ronneberger, Kathryn Tunyasuvunakool, Russ Bates, Augustin Židek, Anna Potapenko, Alex Bridgland, Clemens Meyer, Simon A. A. Kohl, Andrew J. Ballard, Andrew Cowie, Bernardino Romera-Paredes, Stanislav Nikolov, Rishub Jain, Jonas Adler, Trevor Back, Stig Petersen,

- David Reiman, Ellen Clancy, Michal Zielinski, Martin Steinegger, Michalina Pacholska, Tamas Berghammer, Sebastian Bodenstein, David Silver, Oriol Vinyals, Andrew W. Senior, Koray Kavukcuoglu, Pushmeet Kohli, and Demis Hassabis. Highly accurate protein structure prediction with AlphaFold. *Nature*, 596(7873):583–589, August 2021. ISSN 1476-4687. doi: 10.1038/s41586-021-03819-2. Number: 7873 Publisher: Nature Publishing Group.
83. Milot Mirdita, Konstantin Schütze, Yoshitaka Moriwaki, Lim Heo, Sergey Ovchinnikov, and Martin Steinegger. ColabFold: making protein folding accessible to all. *Nat Methods*, 19(6):679–682, June 2022. ISSN 1548-7105. doi: 10.1038/s41592-022-01488-1. Number: 6 Publisher: Nature Publishing Group.
84. Thomas D. Goddard, Conrad C. Huang, Elaine C. Meng, Eric F. Pettersen, Gregory S. Couch, John H. Morris, and Thomas E. Ferrin. UCSF ChimeraX: Meeting modern challenges in visualization and analysis. *Protein Sci*, 27(1):14–25, January 2018. ISSN 1469-896X. doi: 10.1002/pro.3235. Number: 1.
85. Pere Mestre, Gautier Arista, Marie-Christine Piron, Camille Rustenholz, Christophe Ritzenhaller, Didier Merdinoglu, and Jean-François Chich. Identification of a *Vitis vinifera* endo- $\beta$ -1,3-glucanase with antimicrobial activity against *Plasmopara viticola*. *Mol. Plant Pathol.*, 18(5):708–719, 2017. ISSN 1364-3703. doi: 10.1111/mpp.12431. Number: 5.
